# Supplementary material for: Leakage Mechanism and Cycling Behavior of Ferroelectric Al0.7Sc0.3N
Source: MDPI journal article supplement (doi:10.3390/ma17020397), 2024-01-12
Supplement: s1 [file s1]

## Supporting Information

# Leakage Mechanism and Cycling Behavior of Ferroelectric $\text{Al}_{0.7}\text{Sc}_{0.3}\text{N}$

Li Chen <sup>1,†</sup>, Qiang Wang <sup>2,†</sup>, Chen Liu <sup>1,\*</sup>, Minghua Li <sup>1</sup>, Wendong Song <sup>1</sup>, Weijie Wang <sup>1</sup>,  
Desmond K. Loke <sup>2,\*</sup> and Yao Zhu <sup>1,\*</sup>

<sup>1</sup> Institute of Microelectronics, Agency for Science, Technology and Research (A\*STAR), Singapore 138634, Singapore; chen\_li@ime.a-star.edu.sg (L.C.); li\_minghua@ime.a-star.edu.sg (M.L.);

song\_wen\_dong@ime.a-star.edu.sg (W.S.); wang\_weijie@ime.a-star.edu.sg (W.W.)

<sup>2</sup> Department of Science, Mathematics and Technology, Singapore University of Technology and Design, Singapore 487372, Singapore; wang\_qiang@ihpc.a-star.edu.sg

\* Correspondence: liu\_chen@ime.a-star.edu.sg (C.L.); desmond\_loke@sutd.edu.sg (D.K.L.); zhuya@ime.a-star.edu.sg (Y.Z.)

<sup>†</sup> These authors contributed equally to this work.

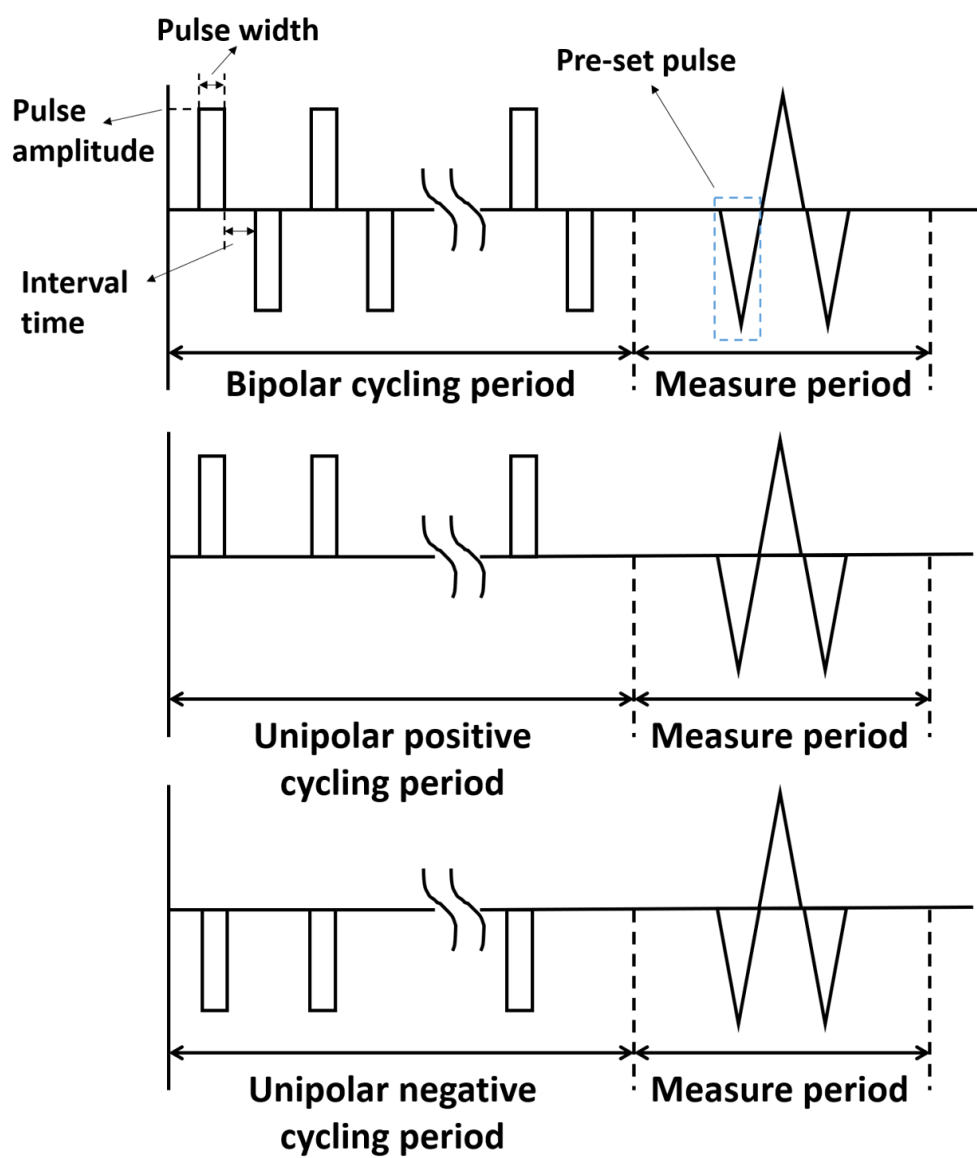

**Figure S1.** Schematic of the pulse setup for cycling tests.

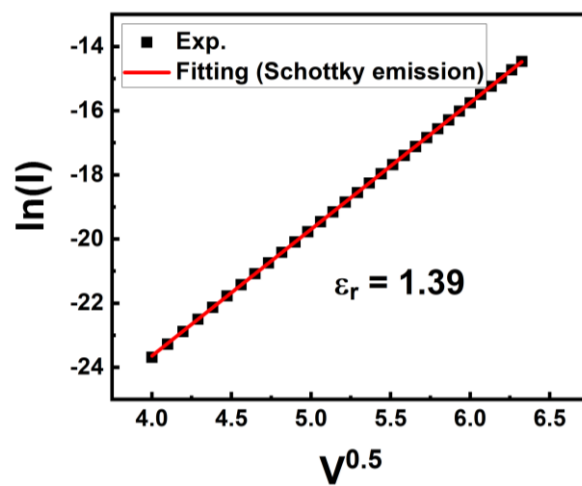

**Figure S2.** Fitting of experimental  $\ln(I)$ - $V^{0.5}$  data to the Schottky emission model. The extracted optical dielectric constant is 1.39.

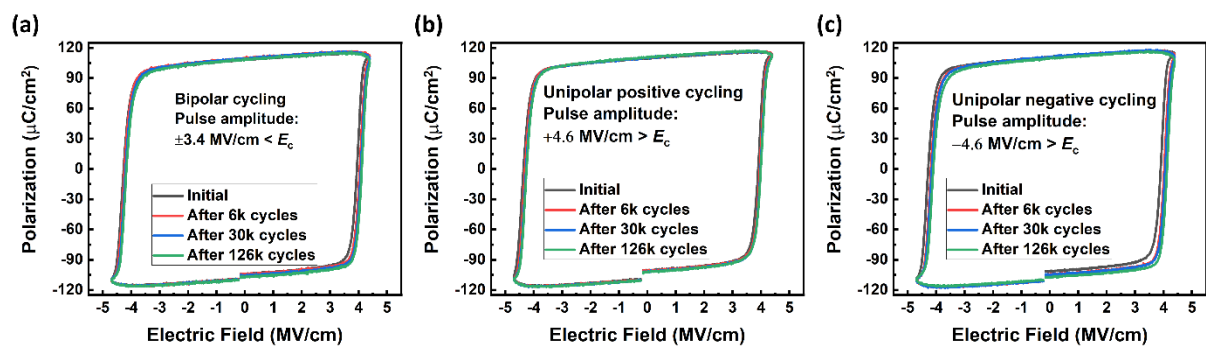

**Figure S3.**  $P$ - $E$  loops of the devices undergoing bipolar cycling with a pulse amplitude smaller than  $E_c$  (a), and unipolar cycling with a pulse amplitude larger than  $E_c$  (b)-(c), respectively. There are no obvious  $P$ - $E$  degradation for all these three cases.
